# Supplementary figures and images for: Poor prognosis of stage I lung adenocarcinoma patients determined by elevated expression over pre/minimally invasive status of COL11A1 and THBS2 in the focal adhesion pathway
Source: Research Square preprint supplement (doi:10.21203/rs.3.rs-1218087/v1), 2022-01-13

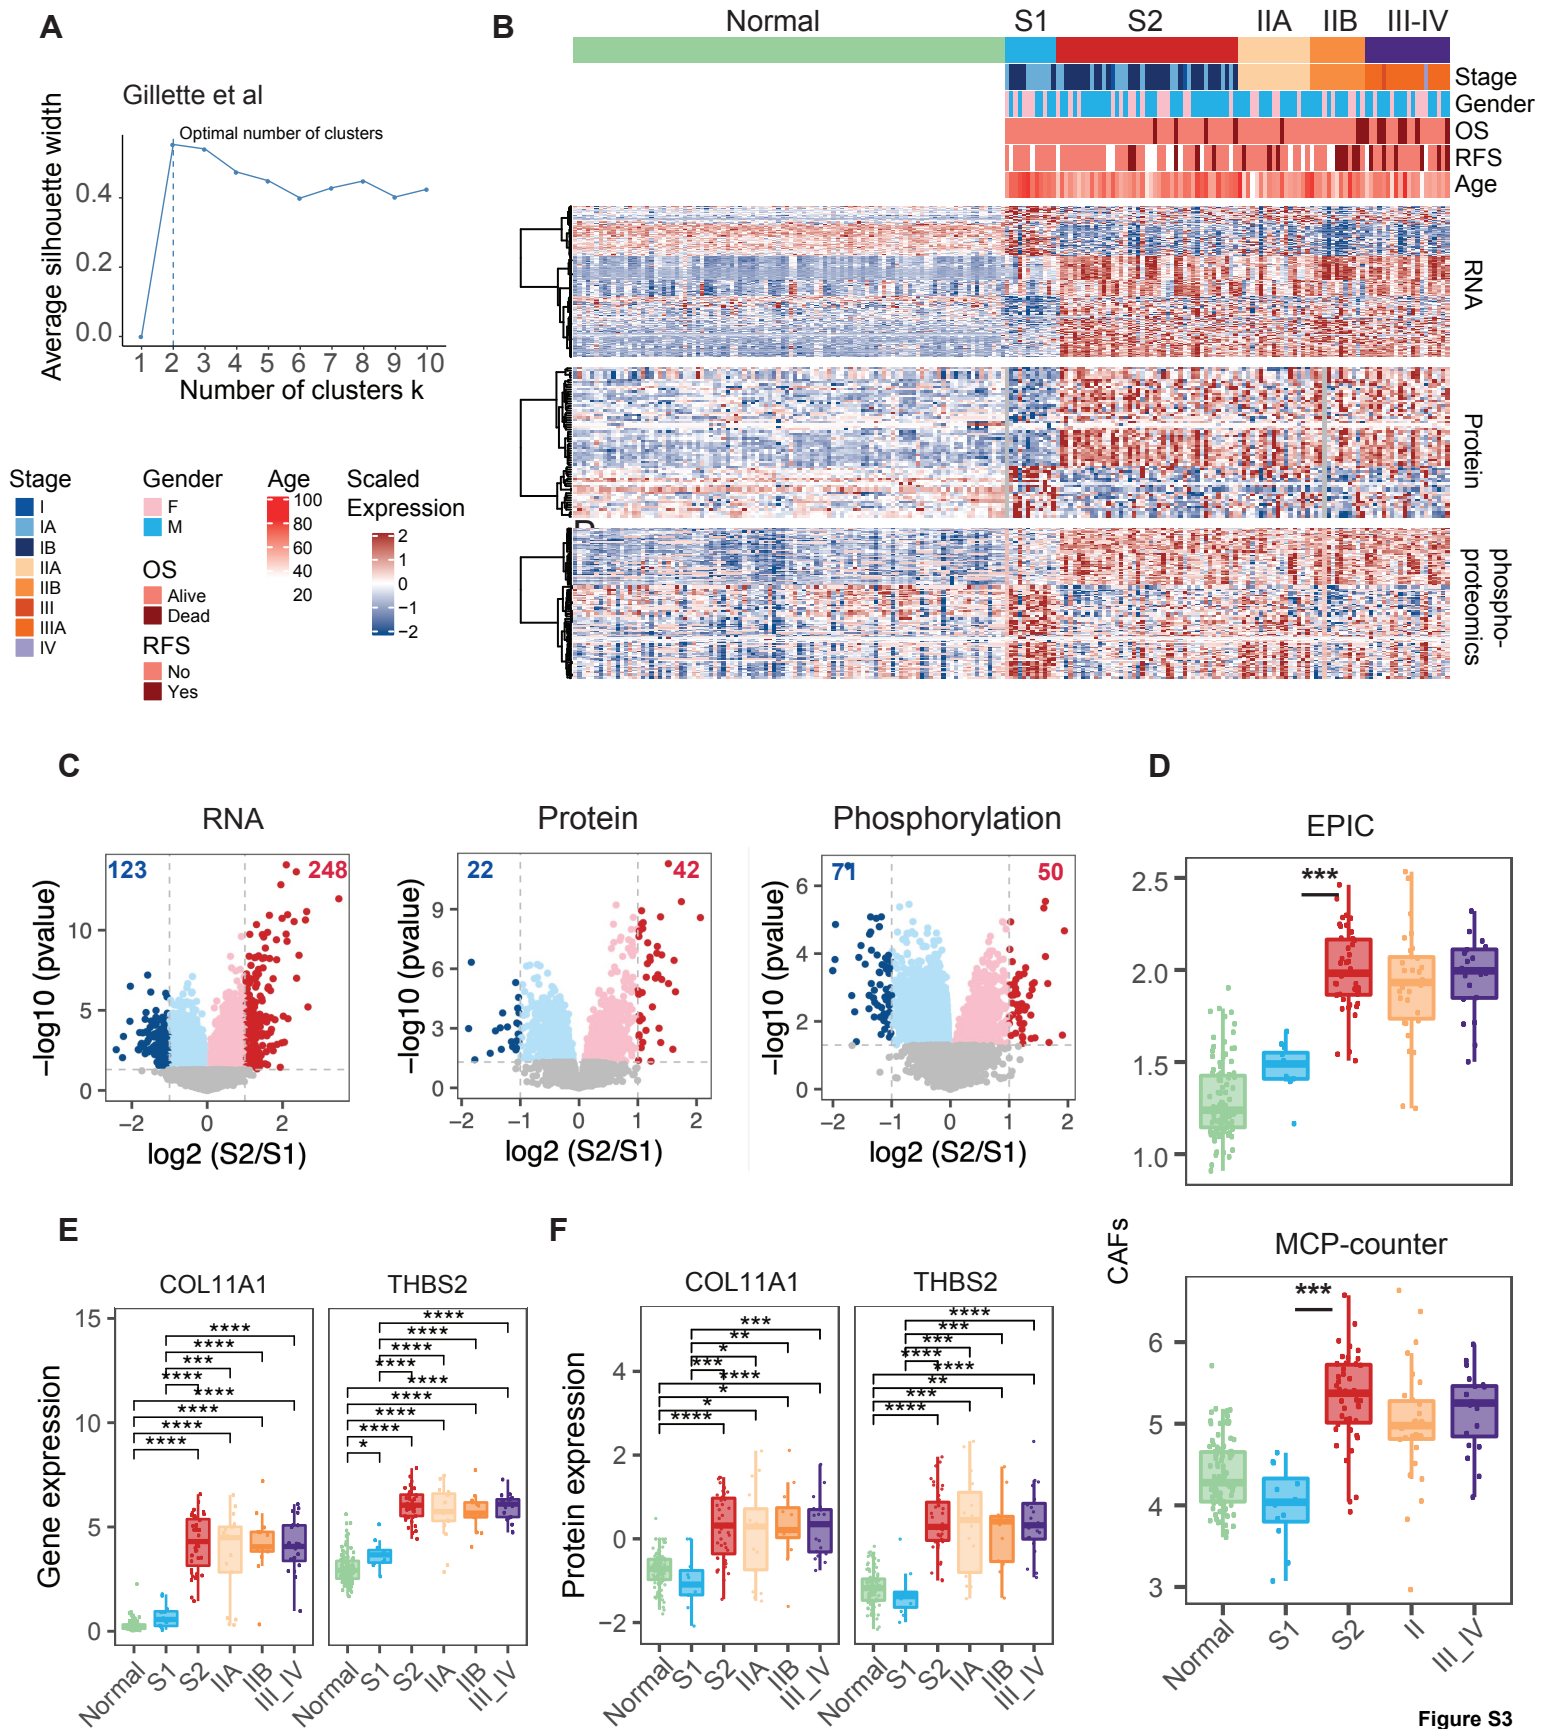

Figure S3

Supplement: Supplementary file 1 [file 309926b02e1e31ef355dbee0.pdf]
